# Supplementary material for: The Transcriptional Responses of Ectomycorrhizal Fungus, Cenococcum geophilum, to Drought Stress
Source: MDPI journal article supplement (doi:10.3390/jof9010015), 2022-12-21
Supplement: s1 [file s1]

**Supplemental Table S1.** Mycelia area of different isolates of *Cenococcum geophilum* under drought treatment.

| Isolate no. | CK (cm <sup>2</sup> ) |      |      |         | 10% PEG-6000(cm <sup>2</sup> ) |      |      |         |               |                   |
|-------------|-----------------------|------|------|---------|--------------------------------|------|------|---------|---------------|-------------------|
|             | A                     | B    | C    | average | A                              | B    | C    | average | relative area |                   |
| ChCg001     | 7.64                  | 7.83 | 7.58 | 7.68    | 2.57                           | 2.42 | 2.42 | 2.47    | 32.1%         | drought-sensitive |
| JaCg040     | 5.67                  | 5.64 | 5.66 | 5.66    | 3.07                           | 3.09 | 3.12 | 3.09    | 54.7%         |                   |
| JaCg045     | 6.84                  | 7.23 | 7.34 | 7.14    | 2.48                           | 2.63 | 2.04 | 2.38    | 33.4%         |                   |
| JaCg153     | 2.68                  | 2.04 | 1.98 | 2.23    | 2.79                           | 3.09 | 3.1  | 2.99    | 134.0%        | drought-tolerant  |
| JaCg205     | 3.11                  | 3.27 | 3.2  | 3.19    | 3.12                           | 2.92 | 2.84 | 2.96    | 92.7%         |                   |
| JaCg037     | 3.81                  | 3.72 | 3.71 | 3.75    | 3.69                           | 3.57 | 3.99 | 3.75    | 100.1%        |                   |

**Supplemental Table S2.** Geographic and host information of different isolates of *Cenococcum geophilum* used in this paper.

| Isolate No. | Origin                                              | Host tree species        |
|-------------|-----------------------------------------------------|--------------------------|
| Chcg01      | Yunnan Province, China                              | <i>Pinus yunnanensis</i> |
| Jacg37      | Numazu Prefecture, Japan                            | <i>Pinus thunbergii</i>  |
| Jacg40      | Numazu Prefecture, Japan                            | <i>Pinus thunbergii</i>  |
| Jacg45      | Numazu Prefecture, Japan                            | <i>Pinus thunbergii</i>  |
| Jacg153     | British Columbia, Canada                            | <i>Picea glehnii</i>     |
| Jacg205     | Mount. Fuji (E35°20'21", N138°47'22", 1554m), Japan | <i>Salix reinii</i>      |

**Supplemental Table S3.** Sequences of primers used for RT-qPCR analysis in this paper.

| Primer             | Sequence (5'-3')      |
|--------------------|-----------------------|
| K441DRAFT_702334-F | CGCAAGTCAGCGATCACCTA  |
| K441DRAFT_702334-R | AGCGGGAGATGAGGGACTTA  |
| K441DRAFT_186058-F | CGTGGTTTGGTCTTTCAGCG  |
| K441DRAFT_186058-R | ACAACACCCTGCAAGTGTC   |
| K441DRAFT_660991-F | ACGGTGCTGTATCCAAGGTC  |
| K441DRAFT_660991-R | TCCGAGGAAGACCACAAGGT  |
| K441DRAFT_685815-F | AGTACCGCCATCGACTTTGG  |
| K441DRAFT_685815-R | AGAATGGTAGCTGCGTCACC  |
| K441DRAFT_554224-F | CCGTTTGATCCACTCCAGTT  |
| K441DRAFT_554224-R | ATGAACACGGCTCTTCTCGT  |
| K441DRAFT_571428-F | ATCCAACCGACCAACCTTCC  |
| K441DRAFT_571428-R | CCGGGCTGTTGTGGTTAAGA  |
| K441DRAFT_656193-F | TTGTACTGGGATGACCGTGC  |
| K441DRAFT_656193-R | TACCATTTTCGTCACGCCTCC |
| Cg-18S-F           | CGGGTAACGGGGAATTAGGG  |
| Cg-18S-R           | CACCAGACTTGCCCTCCAAT  |

**Supplemental Table S4.** Sequencing quality and mapping rates of RNA-seq in different samples.

| <b>Samples</b> | <b>Clean reads</b> | <b>Clean bases</b> | <b>GC Content</b> | <b>%≥Q30</b> |
|----------------|--------------------|--------------------|-------------------|--------------|
| C1CK1          | 24,107,978         | 7,211,183,512      | 51.50%            | 95.31%       |
| C1CK2          | 28,244,618         | 8,453,690,622      | 51.36%            | 95.05%       |
| C1P1           | 29,036,299         | 8,690,372,210      | 51.29%            | 95.15%       |
| C1P2           | 32,067,173         | 9,599,837,558      | 51.32%            | 95.13%       |
| J153CK1        | 40,062,796         | 11,983,623,668     | 51.33%            | 95.48%       |
| J153CK2        | 32,683,972         | 9,770,779,464      | 51.17%            | 95.22%       |
| J153P1         | 26,341,572         | 7,879,053,798      | 51.08%            | 95.23%       |
| J153P2         | 29,571,654         | 8,848,456,106      | 50.98%            | 95.12%       |
| J205CK1        | 29,439,617         | 8,793,867,346      | 51.23%            | 94.99%       |
| J205CK2        | 23,545,532         | 7,044,076,714      | 51.32%            | 95.33%       |
| J205P1         | 29,725,557         | 8,896,335,498      | 51.36%            | 95.28%       |
| J205P2         | 23,078,228         | 6,900,705,752      | 51.45%            | 94.93%       |
| J37CK1         | 20,881,300         | 6,254,611,344      | 50.65%            | 95.35%       |
| J37CK2         | 25,746,602         | 7,706,715,274      | 50.88%            | 95.24%       |
| J37P1          | 22,017,422         | 6,578,725,336      | 50.76%            | 95.28%       |
| J37P2          | 23,126,857         | 6,922,748,292      | 50.79%            | 95.18%       |
| J40CK1         | 20,828,942         | 6,227,599,572      | 51.16%            | 95.43%       |
| J40CK2         | 35,461,701         | 10,616,996,240     | 51.25%            | 95.38%       |
| J40P1          | 22,544,867         | 6,752,388,660      | 51.44%            | 95.20%       |
| J40P2          | 20,373,524         | 6,092,161,376      | 51.36%            | 95.28%       |
| J45CK1         | 19,202,220         | 5,746,472,114      | 51.33%            | 95.23%       |
| J45CK2         | 21,889,402         | 6,556,759,762      | 51.33%            | 95.12%       |
| J45P1          | 28,853,247         | 8,638,831,930      | 51.22%            | 95.02%       |
| J45P2          | 21,690,649         | 6,491,093,662      | 51.25%            | 95.18%       |
